# Supplementary material for: Optimized Therapeutic 177Lu-Labeled PSMA-Targeted Ligands with Improved Pharmacokinetic Characteristics for Prostate Cancer
Source: MDPI journal article supplement (doi:10.3390/ph15121530), 2022-12-09
Supplement: s1 [file s1]

# Supplementary Material of

## Optimized Therapeutic $^{177}\text{Lu}$ -labeled PSMA-targeted Radiopharmaceuticals with Improved Pharmacokinetic Characteristics for Prostate Cancer

Yitian Wu<sup>1</sup>, Xiaojun Zhang<sup>1</sup>, Xiaojiang Duan<sup>2</sup>, Xing Yang<sup>2,3</sup>, Feng Wang<sup>4,\*</sup> and Jinming Zhang<sup>1,\*</sup>

1 Department of Nuclear Medicine, Chinese PLA General Hospital, Beijing 100853, China

2 Department of Nuclear Medicine, Peking University First Hospital, Beijing 100034, China

3 Institute of Medical Technology, Peking University, Beijing 100191, China

4 Department of Nuclear Medicine, Nanjing First Hospital, Nanjing Medical University, Nanjing 210006, China

\* Correspondence: Feng Wang: fengwangcn@hotmail.com and Jinming Zhang: zhangjm301@163.com

### Chemical synthesis of PSMA-Q, PSMA-4PY and PSMA-BP

All the ligands were synthesized via solid-phase synthesis which was performed according to Fmoc peptide synthesis protocol.

i) Fmoc-Glu-urea-Lys-resin (0.22 mmol/g, 100 mg) was added into the solid phase synthesis tube, the compound was rinsed with DCM (3 × 5 min × 2 mL) and DMF (3 × 5 min × 2 mL). To remove Fmoc, the compound was rinsed with DMF containing 20% piperidine (1 × 2 min × 2 mL, 2 × 10 min × 2 mL) and DMF (6 × 1 min × 2 mL).

ii) A mixture of Fmoc-3-(3-quinoline)-D-alanine (Q) or Fmoc-3-(4-pyridyl)-D-alanine (4PY) or Fmoc-3-(biphenyl)-D-alanine (BP) (0.06 mmol, 26.2 mg), HBTU (0.072 mmol, 27 mg), HOBt (0.072 mmol, 10 mg), DIPEA (0.15 mmol, 25  $\mu\text{L}$ ) was stirred in DMF (3 mL) at room temperature for 15 min. The activated 2-pyridine-alanine was added into the cleaned resin and reacted under nitrogen for 1 hour and then rinsed with DMF (6 × 1 min × 2 mL). To remove Fmoc, the compound was rinsed with DMF containing 20% piperidine (1 × 2 min × 2 mL, 2 × 10 min × 2 mL) and DMF (6 × 1 min × 2 mL).

iii) A mixture of trans-4-(Fmoc-aminomethyl)-cyclohexanecarboxylic acid (3 M, 0.06 mmol, 23 mg), HBTU (0.072 mmol, 27 mg), HOBt (0.072 mmol, 10 mg), DIPEA (0.15 mmol, 25  $\mu\text{L}$ ) was stirred in 3 mL DMF at room temperature for 15 min. The activated cyclohexane formic acid was added into the cleaned resin and reacted under nitrogen for 1 hour and then rinsed with DMF (6 × 1 min × 2 mL). To remove Fmoc, the compound was rinsed with DMF containing 20% piperidine (1 × 2 min × 2 mL, 2 × 10 min × 2 mL) and DMF (6 × 1 min × 2 mL).

iiii) A mixture of DOTA tert-butyl ester (3 M, 0.06 mmol, 34.4 mg), HBTU (0.072 mmol, 27 mg), HOBt (0.072 mmol, 10 mg) and DIPEA (0.15 mmol, 25  $\mu\text{L}$ ) was stirred in 3 mL of DMF at room temperature for 15 min. The activated DOTA tert-butyl ester was added to the cleaned resin and reacted under nitrogen for 1 hour and then rinsed with DMF (6 × 1 min × 2 mL). A solution of TFA (4.5 mL), TIPS (250  $\mu\text{L}$ ), H<sub>2</sub>O (250  $\mu\text{L}$ ) was added and reacted at room temperature for 2 h. The filtrate was collected and washed with TFA (2 mL). The final products (PSMA-Q, PSMA-4PY and PSMA-BP) were purified by HPLC.

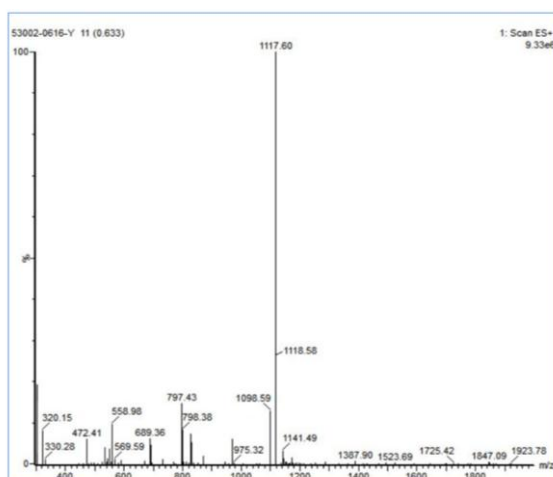

PSMA-4PY

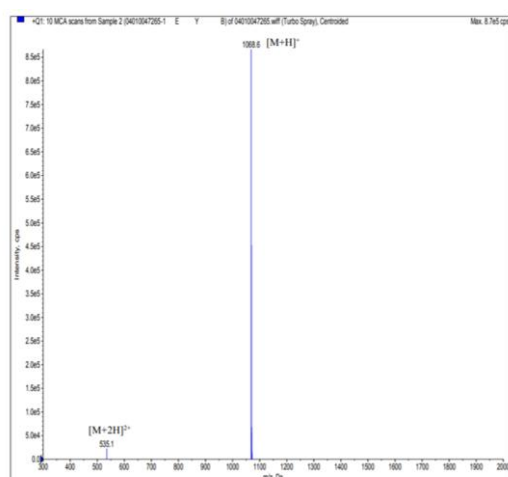

PSMA-BP

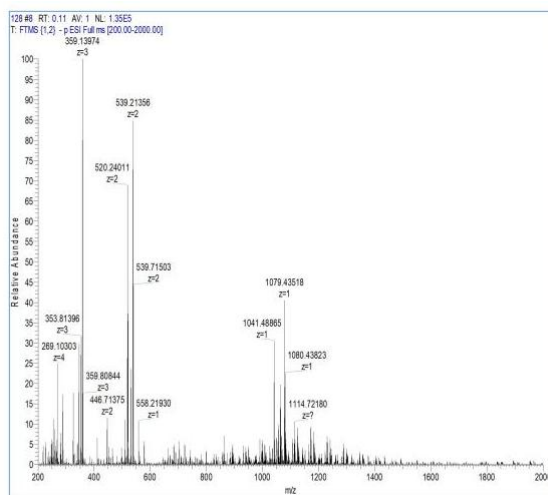

PSMA-Q

Figure S1. ESI-MS chromatogram of novel PSMA ligands
